# Supplementary material for: Sensitivity of Food-Based Recommendations Developed Using Linear Programming to Model Input Data in Young Kenyan Children
Source: MDPI journal article supplement (doi:10.3390/nu13103485), 2021-09-30
Supplement: s1 [file s1]

**Supplementary Table S1.** Median consumption frequencies per food group per week

| Food group <sup>1</sup>                   | Consump-<br>tion fre-<br>quencies<br>/week <sup>2</sup> |
|-------------------------------------------|---------------------------------------------------------|
| Added fats                                | 7                                                       |
| Added sugars                              | 7                                                       |
| Bakery & breakfast cereals                | 0                                                       |
| Dairy products                            | 7                                                       |
| Fruits                                    | 0                                                       |
| Grains & grain products                   | 10                                                      |
| Legumes, nuts & seeds                     | 0                                                       |
| Meat, fish & eggs                         | 1                                                       |
| Starchy roots & other starchy plant foods | 0                                                       |
| Vegetables                                | 14                                                      |

<sup>1</sup> See Supplementary Table S2 for more details on classification of foods

<sup>2</sup> Based on 124 24-hour dietary recalls
