# Supplementary material for: Sensitivity of Food-Based Recommendations Developed Using Linear Programming to Model Input Data in Young Kenyan Children
Source: MDPI journal article supplement (doi:10.3390/nu13103485), 2021-09-30
Supplement: s1 [file s1]

**Supplementary Table S3** Minimum and maximum number of daily amounts per week required for linear programming in the reference scenario and 5 alternative ‘dietary intake data’ and ‘selection criteria’ scenarios for Kenyan children, 4-6 years of age

| Food (sub)group                                          | Reference<br>Scenario <sup>1</sup> |           | Scenario A<br>Est freq <sup>2</sup> |           | Scenario B<br>Rp freq <sup>3</sup> , 1 recall |           | Scenario C<br>Est freq <sup>2</sup> , 1 recall |           | Scenario D<br>≥10% cons <sup>4</sup> |           | Scenario E<br>All foods |           | Scenario F<br>10 <sup>th</sup> -90 <sup>th</sup> perc <sup>5</sup> |           |
|----------------------------------------------------------|------------------------------------|-----------|-------------------------------------|-----------|-----------------------------------------------|-----------|------------------------------------------------|-----------|--------------------------------------|-----------|-------------------------|-----------|--------------------------------------------------------------------|-----------|
|                                                          | min                                | max       | min                                 | max       | min                                           | max       | min                                            | max       | min                                  | max       | min                     | max       | min                                                                | max       |
|                                                          | Number of daily amounts/week       |           |                                     |           |                                               |           |                                                |           |                                      |           |                         |           |                                                                    |           |
| <b>Added fats</b>                                        | <b>0</b>                           | <b>7</b>  | <b>4</b>                            | <b>11</b> | <b>0</b>                                      | <b>7</b>  | <b>0</b>                                       | <b>7</b>  | <b>0</b>                             | <b>7</b>  | <b>0</b>                | <b>7</b>  | <b>3</b>                                                           | <b>7</b>  |
| Butter, ghee, margarine (unfortified)                    | 0                                  | 7         | 0                                   | 7         | 0                                             | 7         | 0                                              | 7         | 0                                    | 7         | 0                       | 7         | 0                                                                  | 7         |
| Vegetable oil (unfortified)                              | 0                                  | 7         | 0                                   | 7         | 0                                             | 7         | 0                                              | 7         | 0                                    | 7         | 0                       | 7         | 0                                                                  | 7         |
| <b>Added sugars</b>                                      | <b>0</b>                           | <b>7</b>  | <b>4</b>                            | <b>11</b> | <b>1</b>                                      | <b>7</b>  | <b>7</b>                                       | <b>7</b>  | <b>0</b>                             | <b>7</b>  | <b>0</b>                | <b>7</b>  | <b>3</b>                                                           | <b>7</b>  |
| <b>Bakery &amp; breakfast cereals<sup>6</sup></b>        | <b>0</b>                           | <b>3</b>  | <b>0</b>                            | <b>4</b>  | <b>0</b>                                      | <b>3</b>  | <b>0</b>                                       | <b>7</b>  | <b>--</b>                            | <b>--</b> | <b>0</b>                | <b>3</b>  | <b>--</b>                                                          | <b>--</b> |
| <b>Dairy products</b>                                    | <b>0</b>                           | <b>8</b>  | <b>0</b>                            | <b>11</b> | <b>0</b>                                      | <b>12</b> | <b>0</b>                                       | <b>14</b> | <b>0</b>                             | <b>7</b>  | <b>0</b>                | <b>8</b>  | <b>0</b>                                                           | <b>7</b>  |
| Fluid or powdered milk (fortified) <sup>6</sup>          | --                                 | --        | 0                                   | 4         | 0                                             | 3         | 0                                              | 7         | --                                   | --        | --                      | --        | --                                                                 | --        |
| Fluid or powdered milk (non-fortified)                   | 0                                  | 8         | 0                                   | 11        | 0                                             | 9         | 0                                              | 14        | 0                                    | 7         | 0                       | 8         | 0                                                                  | 7         |
| <b>Fruits</b>                                            | <b>0</b>                           | <b>7</b>  | <b>0</b>                            | <b>7</b>  | <b>0</b>                                      | <b>7</b>  | <b>0</b>                                       | <b>14</b> | <b>0</b>                             | <b>7</b>  | <b>0</b>                | <b>7</b>  | <b>0</b>                                                           | <b>2</b>  |
| Vitamin A source fruit                                   | 0                                  | 7         | 0                                   | 7         | 0                                             | 7         | 0                                              | 7         | 0                                    | 7         | 0                       | 7         | 0                                                                  | 2         |
| Vitamin C-rich fruit <sup>6</sup>                        | --                                 | --        | 0                                   | 7         | 0                                             | 5         | 0                                              | 7         | --                                   | --        | --                      | --        | --                                                                 | --        |
| <b>Grains &amp; grain products</b>                       | <b>4</b>                           | <b>22</b> | <b>11</b>                           | <b>28</b> | <b>4</b>                                      | <b>24</b> | <b>7</b>                                       | <b>35</b> | <b>4</b>                             | <b>22</b> | <b>4</b>                | <b>22</b> | <b>5</b>                                                           | <b>21</b> |
| Enriched/fortified grains and products, whole or refined | 0                                  | 7         | 0                                   | 7         | 0                                             | 7         | 0                                              | 7         | 0                                    | 7         | 0                       | 7         | 0                                                                  | 3         |
| Refined grains and products, unenriched/unfortified      | 0                                  | 7         | 0                                   | 11        | 0                                             | 7         | 0                                              | 14        | 0                                    | 7         | 0                       | 7         | 0                                                                  | 4         |
| Whole grains and products, unenriched/unfortified        | 2                                  | 21        | 7                                   | 21        | 1                                             | 23        | 7                                              | 28        | 2                                    | 21        | 2                       | 21        | 4                                                                  | 16        |
| <b>Legumes, nuts &amp; seeds<sup>6</sup></b>             | <b>0</b>                           | <b>4</b>  | <b>0</b>                            | <b>11</b> | <b>0</b>                                      | <b>4</b>  | <b>0</b>                                       | <b>7</b>  | <b>0</b>                             | <b>3</b>  | <b>0</b>                | <b>4</b>  | <b>--</b>                                                          | <b>--</b> |
| Cooked beans, lentils and peas <sup>6</sup>              | 0                                  | 3         | 0                                   | 11        | 0                                             | 4         | 0                                              | 7         | 0                                    | 3         | 0                       | 3         | --                                                                 | --        |
| Nuts, seeds and unsweetened products <sup>6</sup>        | 0                                  | 1         | 0                                   | 4         | --                                            | --        | --                                             | --        | --                                   | --        | 0                       | 1         | --                                                                 | --        |

Supplementary Table S3 Cont.

| Food (sub)group                                                  | Reference Scenario <sup>1</sup> |           | Scenario A Est freq <sup>2</sup> |           | Scenario B Rp freq <sup>3</sup> , 1 recall |           | Scenario C Est freq <sup>2</sup> , 1 recall |           | Scenario D ≥10% cons <sup>4</sup> |           | Scenario E All foods |           | Scenario F 10 <sup>th</sup> -90 <sup>th</sup> perc <sup>5</sup> |           |
|------------------------------------------------------------------|---------------------------------|-----------|----------------------------------|-----------|--------------------------------------------|-----------|---------------------------------------------|-----------|-----------------------------------|-----------|----------------------|-----------|-----------------------------------------------------------------|-----------|
|                                                                  | min                             | max       | min                              | max       | min                                        | max       | min                                         | max       | min                               | max       | min                  | max       | min                                                             | max       |
|                                                                  | Number of daily amounts/week    |           |                                  |           |                                            |           |                                             |           |                                   |           |                      |           |                                                                 |           |
| <b>Meat, fish &amp; eggs</b>                                     | <b>0</b>                        | <b>7</b>  | <b>0</b>                         | <b>11</b> | <b>0</b>                                   | <b>5</b>  | <b>0</b>                                    | <b>14</b> | <b>0</b>                          | <b>7</b>  | <b>0</b>             | <b>7</b>  | <b>0</b>                                                        | <b>3</b>  |
| Eggs <sup>6</sup>                                                | 0                               | 1         | 0                                | 4         | 0                                          | 1         | --                                          | --        | 0                                 | 1         | 0                    | 1         | --                                                              | --        |
| Fish without bones <sup>6</sup>                                  | 0                               | 4         | 0                                | 7         | 0                                          | 4         | 0                                           | 7         | 0                                 | 4         | 0                    | 4         | --                                                              | --        |
| Small, whole fish, with bones                                    | 0                               | 3         | 0                                | 7         | 0                                          | 4         | 0                                           | 7         | 0                                 | 3         | 0                    | 3         | 0                                                               | 3         |
| <b>Starchy roots &amp; other starchy plant foods<sup>6</sup></b> | <b>--</b>                       | <b>--</b> | <b>0</b>                         | <b>4</b>  | <b>0</b>                                   | <b>1</b>  | <b>0</b>                                    | <b>7</b>  | <b>--</b>                         | <b>--</b> | <b>--</b>            | <b>--</b> | <b>--</b>                                                       | <b>--</b> |
| <b>Vegetables</b>                                                | <b>2</b>                        | <b>28</b> | <b>11</b>                        | <b>32</b> | <b>2</b>                                   | <b>30</b> | <b>7</b>                                    | <b>35</b> | <b>2</b>                          | <b>28</b> | <b>2</b>             | <b>28</b> | <b>5</b>                                                        | <b>24</b> |
| Other vegetables                                                 | 0                               | 21        | 4                                | 21        | 0                                          | 28        | 0                                           | 28        | 0                                 | 21        | 0                    | 21        | 3                                                               | 21        |
| Vitamin A source dark green leafy vegetables                     | 0                               | 4         | 0                                | 7         | 0                                          | 5         | 0                                           | 7         | 0                                 | 4         | 0                    | 4         | 0                                                               | 3         |
| Vitamin C-rich vegetables                                        | 0                               | 6         | 0                                | 11        | 0                                          | 6         | 0                                           | 14        | 0                                 | 6         | 0                    | 6         | 0                                                               | 4         |

<sup>1</sup> Reference scenario: 2 recalls, reported frequencies, selected foods consumed by ≥3% of the children, frequencies selected from the 5<sup>th</sup> and 95<sup>th</sup> percentile of distribution, energy requirement based on average bodyweight and 30 en% fat requirement

<sup>2</sup> Est freq: Estimated frequencies

<sup>3</sup> Rp freq: Reported frequencies

<sup>4</sup> ≥10% cons: Foods selected that are consumed by at least 10% of the children

<sup>5</sup> 10<sup>th</sup>-90<sup>th</sup> perc: Minimum frequencies/week selected from the 10<sup>th</sup> percentile of distribution and maximum frequencies/week selected from the 90<sup>th</sup> percentile of distribution

<sup>6</sup> --: not included in the model
