# Supplementary material for: Sensitivity of Food-Based Recommendations Developed Using Linear Programming to Model Input Data in Young Kenyan Children
Source: MDPI journal article supplement (doi:10.3390/nu13103485), 2021-09-30
Supplement: s1 [file s1]

**Supplementary Table S2.** Median daily amount per food consumed by >3% of the Kenyan children 4-6 years of age, calculated from 2 recalls compared with 1 recall

|                                        | 2                                       | 1      |                                                      | 2                                       | 1      |
|----------------------------------------|-----------------------------------------|--------|------------------------------------------------------|-----------------------------------------|--------|
|                                        | recalls                                 | recall |                                                      | recalls                                 | recall |
| Food name                              | Amount per food<br>(g/day) <sup>1</sup> |        | Food name                                            | Amount per food<br>(g/day) <sup>1</sup> |        |
| <b>Added fats</b>                      |                                         |        | <b>Legumes, nuts &amp; seeds</b>                     |                                         |        |
| Fat                                    | 10                                      | 7      | Beans black, dried <sup>2</sup>                      | 48                                      | --     |
| Oil                                    | 24                                      | 19     | Beans cocoa rose, dried                              | 35                                      | 31     |
| <b>Added sugars</b>                    |                                         |        | Beans mung, dried                                    | 61                                      | 71     |
| Sugar brown                            | 39                                      | 37     | Beans red, dried                                     | 29                                      | 29     |
| Sugar white                            | 25                                      | 23     | Beans white, dried                                   | 42                                      | 77     |
| <b>Bakery &amp; breakfast cereals</b>  |                                         |        | Peas cow, dried                                      | 50                                      | 50     |
| Bread white                            | 74                                      | 64     | Groundnut, fresh <sup>3</sup>                        | 68                                      | --     |
| Bread white Supaloaf                   | 89                                      | 89     | Groundnut, boiled <sup>3</sup>                       | 108                                     | --     |
| <b>Beverages</b>                       |                                         |        | <b>Meat, fish &amp; eggs</b>                         |                                         |        |
| Chocolate powder drinking <sup>3</sup> | 22                                      | --     | Egg, baked                                           | 36                                      | 25     |
| <b>Dairy products</b>                  |                                         |        | Catfish boiled                                       | 26                                      | 30     |
| Milk cow whole, Brookside <sup>2</sup> | 56                                      | --     | Fulu fish, fried                                     | 22                                      | 14     |
| Milk cow whole, Brookside boiled       | 83                                      | 103    | Mud fish, boiled <sup>3</sup>                        | 59                                      | --     |
| Milk cow sour                          | 237                                     | 222    | Mud fish, fried <sup>3</sup>                         | 26                                      | --     |
| Milk cow whole, fresh                  | 222                                     | 308    | Nile perch fish, boiled                              | 15                                      | 15     |
| Milk cow whole, boiled                 | 94                                      | 98     | Nile perch fish, fried <sup>3</sup>                  | 36                                      | --     |
| <b>Fruits</b>                          |                                         |        | Tilapia fish, boiled <sup>2</sup>                    | 62                                      | --     |
| Mango ripe                             | 64                                      | 64     | Tilapia fish, fried <sup>2</sup>                     | 32                                      | --     |
| Avocado                                | 93                                      | 129    | Omena Dagaa, dried, boiled                           | 14                                      | 13     |
| Banana ripe                            | 152                                     | 152    | Omena Dagaa, dried, fried                            | 18                                      | 20     |
| Juice lemon                            | 4                                       | 4      | Omena Dagaa, boiled                                  | 35                                      | 35     |
| Orange <sup>3</sup>                    | 46                                      | --     | Omena Dagaa, fried                                   | 19                                      | 16     |
| Papaya                                 | 37                                      | 34     | <b>Starchy roots &amp; other starchy plant foods</b> |                                         |        |
| <b>Grains &amp; grain products</b>     |                                         |        | Plantain                                             | 83                                      | 83     |
| Flour wheat Tropicana fortified        | 16                                      | 21     | Flour cassava                                        | 23                                      | 14     |
| Flour wheat white                      | 15                                      | 19     | Potatoes Irish <sup>3</sup>                          | 58                                      | --     |
| Rice white                             | 57                                      | 49     | Potatoes sweet                                       | 172                                     | 172    |
| Flour fingermillet                     | 54                                      | 55     | <b>Vegetables</b>                                    |                                         |        |
| Flour maize white whole                | 128                                     | 128    | Onion bulb red, fried                                | 4                                       | 4      |
| Flour maize white <sup>2</sup>         | 108                                     | --     | Onion stem, boiled                                   | 2                                       | 3      |
| Flour maize yellow                     | 107                                     | 124    | Onion stem, fried                                    | 4                                       | 3      |
| Flour sorghum                          | 27                                      | 23     | Tomato, boiled                                       | 11                                      | 13     |
| Maize grains white, dried              | 98                                      | 106    | Tomato, fried                                        | 16                                      | 15     |
| Maize grains yellow, dried             | 91                                      | 93     | Sukuma wiki, fried                                   | 24                                      | 22     |
| Maize, roasted                         | 87                                      | 88     | Cabbage, fried                                       | 98                                      | 122    |
|                                        |                                         |        | Cowpea leaves, boiled                                | 38                                      | 22     |
|                                        |                                         |        | Okra, boiled                                         | 3                                       | 2      |
|                                        |                                         |        | Okra, fried <sup>2</sup>                             | 7                                       | --     |

<sup>1</sup> Values are median daily amounts of the raw or dried edible portions per food

<sup>2</sup> Food not reported in the first recalls

<sup>3</sup> Food consumed by <3% of the children in the first recalls and therefore not included in food list
